Development 133, 2596 (2006) doi:10.1242/dev.02461

## Identification, emergence and mobilization of circulating endothelial cells or progenitors in the embryo

**Luc Pardanaud and Anne Eichmann** *Development* **133**, 2527-2537.

The ePress version of this article published on the 25th May contains an error in the author affiliations and in Fig. 2N,O.

The final printed and online versions of the article are correct.

We apologise to the authors and readers for this mistake.
